# Supplementary material for: Drugs Modulating CD4+ T Cells Blood-Brain Barrier Interaction in Alzheimer's Disease
Source: Preprints.org preprint supplement (doi:10.20944/preprints202008.0500.v1), 2020-08-24
Supplement: Supplementary file 1 [file supplementary]

**Table 1. Drugs that could be used to modulate T cell migration in AD.**

| **Drug** | **BBB interaction** | **T cell effect** | **AD effect** |
| --- | --- | --- | --- |
| Albumin | non-saturable passive diffusion [1] [2] | Albumin functions as an inhibitor of T cell adhesion in vitro[3]. | Improve prognosis [4] |
| Avidin | Receptor mediated [5] | Activation of specific T cell lines [6] | Not clear |
| Aβ – binding peptides | Depending on their lipophilicity, most will diffuse passively, other by active transport or paracellular transport | Not known | Inhibition of Aβ aggregation |
| Basic adrenocorticotropic analogue, ebitaride | [7] Adsorptive-mediated transcytosis | Not known | Not known |
| Basic peptide 001-C8 | Adsorptive-mediated transcytosis [8] | Not known | Not known |
| Caffeine | Simple diffusion and saturable, carrier-mediated transport [9] [10]. | Difference between in vivo and in vitro studies [11] | Improve prognosis [9] |
| Chitosan nanoparticles | Drug-delivery systems- adsorption-mediated endocytosis | Stimulate proliferation of CD4+ T cells  , promote activation of Th1 and Th2,but when exposed directly to naive CD4 failed to induce T cell polarization | Depends on the carried active drug |
| CRM197, a non toxic mutant of diphtheria toxin | Saturable transport [12] putative vaccine | Enhanced T cell activation [13] | Patent pending[14] |
| Crocus sativus | [15] | Not known | protective agents |
| Curcumin | [16] | Not known | Not known |
| Diamine and polyamines | [12] Saturable transport | Not known | Not known |
| DMPC:DMPG: cholesterol  liposomes | Not known | Not known | Not known |
| Donepezil (Aricept) | organic cation transporter [17] | Not investigated | Improve prognosis |
| Ferulic Acid | [16] | Not known | Not known |
| Fructus Akebiae | [18] | Not known | Not known |
| Galantamine (Razadyne). | organic cation transporter | attenuate T cell proliferation, at least in non-obese diabetic mice | Improve prognosis |
| Glatiramer acetate | Not known | Affect T cells | Improve prognosis |
| Ghrelin | Saturable transport | Not known | neuroprotective and palliative[19] |
| Glucose | Glut transporters [20][21] | Regulates T cell activation [22] | Improve prognosis [23] |
| Green tea | [16] | Not known | Not known |
| Hesperidin | [24] | Not known | Not known |
| Huperzine A | [25] transmembrane diffusion | reduce lymphocyte proliferation and the secretion of pro-inflammatory cytokines | Choline esterase inhibitor |
| Insulin | Bypass BBB | Not known | Improve prognosis [26] |
| Ladostigil | [25] transmembrane diffusion | reduce lymphocyte proliferation and the secretion of pro-inflammatory cytokines | a cholinesterase and monoamine oxidase inhibitor |
| Latrepirdine | [25] transmembrane diffusion | Some AChE inhibitors were shown to  reduce lymphocyte proliferation and the secretion of pro-inflammatory cytokines | inhibitor of cholinesterase and NMDA receptors – no cognitive improvement in AD patients |
| L-DOPA | Saturable transport | Not known | Not known |
| Leptin | Saturable transport | Not known | Improve prognosis[27] |
| Lipoic acid | [16] | Not known | Not known |
| Low density lipoprotein | Receptor mediated [5] | Low density lipoprotein promotes human naive T cell differentiation[28] | Worsen prognosis[29] |
| Melanotransferrin | Saturable transport [12] | Not known | Not known |
| Memantine | [30] multiple organic cation transport | Unresolved [31] | Approved as AD drug, short term improvement [32] |
| Nanoparticles of Nisopropylacrylamide,  vinylpyrrolidone and  acrylic acid | Drug-delivery systems- Lower molecular weight (less than 400 Da) and size below 100 nm can pass through the BBB through diffusion mechanisms | Not known | Not clear |
| Naringin | [33] | Not known | Not known |
| P7C3 | [34] | Not known | Not known |
| Peptide Nucleic Acids | Saturable transport | Not known | Improve prognosis [35] |
| Peptide Transport System-1 | Saturable transport [36] | Not known | Not known |
| Phenserine | [25] transmembrane diffusion | reduce lymphocyte proliferation and the secretion of pro-inflammatory cytokines | Choline esterase inhibitor;  potentially benefiting mild to moderate Alzheimer’s disease symptomatically |
| Phosphorothioate Oligonucleotides | receptor-mediated endocytosis[37] | rapid induction of the Sp1 transcription factor[38]. | Fewer than 1% of systemically administered oligonucleotides reach the brain[37]. |
| Polysorbate 80-coated  PBCA nanoparticles | Drug-delivery systems- Receptor mediated endocytosis | Not investigated | Depends on the carried active drug |
| Potassium channel binding Peptides | Depending on their lipophilicity, most will diffuse passively, other by active transport or paracellular transport | Potassium Channel KV1.3 peptide blockers selectively supress effective memory T cells (TEM) | inhibition of Potassium Channel KV1.3 |
| Quercetin | [39] | Immunosuppressive [40] | Improve prognosis [41] |
| Resveratrol | [16] | Not known | Not known |
| Rivastigmine (Exelon) | organic cation transporter | T cell proliferation and VGF expression in AD patients decreased | Improve prognosis |
| rosmarinic acid | [42] | Not known | Not known |
| Rosmarinus officinalis | [43] | Not known | Not known |
| Rutin | [44] | Not known | Not known |
| Selegeline | [16] | Not known | Not known |
| Tacrine | [30] multiple organic cation transport[45] | Not known | Approved as AD drug however does not have a decisive effect [46] |
| Trimethylated chitosan  coated PLGA nanoparticles | adsorption-mediated endocytosis | Not known | Depends on the carried active drug |
| Triptolide | [47] | Inhibit T cells [48] | Potential candidate for drug [47] |
| Vaccination | N/A | First generation vaccines – activation of cytotoxic T cells  Second generation – vaccines – no T cell activation | Decrease of Aβ plaques load, but without significant clinical improvment |
| Vitamin E | Saturable transport [16] | enhances T-cell differentiation [49] | protective agents but need personalization [50] |
| Vitamins B | Saturable transport [20] | Improves proliferative response to mitogens [51] | Contradicting results [52][53] |
| Wheat germ agglutinin | receptor-mediated endocytosis[54] | posses both stimulatory and inhibitory effects on human T lymphocytes [55] | Improve prognosis [56] |
| WY14643 | attenuate BBB breakdown[57] | Regulate differentiation [58] | Not known |
| β-secretase and γ-secretase inhibitors | Transmembrane diffusion | Regulate Th17 and Tregs [59] | Decrease of APP amyloidogenic cleavage, but with significant off target side effects |

**References**

[1] F. Hervé, N. Ghinea, and J.-M. Scherrmann, “CNS Delivery Via Adsorptive Transcytosis,” *AAPS J.*, vol. 10, no. 3, pp. 455–472, Sep. 2008.

[2] A. J. Kastin and W. Pan, “Blood-brain barrier and feeding: regulatory roles of saturable transport systems for ingestive peptides.,” *Curr. Pharm. Des.*, vol. 14, no. 16, pp. 1615–9, 2008.

[3] Y.-L. Kim *et al.*, “Albumin functions as an inhibitor of T cell adhesion in vitro,” *Biochem. Biophys. Res. Commun.*, vol. 351, no. 4, pp. 953–957, Dec. 2006.

[4] A. Ezra, I. Rabinovich-Nikitin, P. Rabinovich-Toidman, and B. Solomon, “Multifunctional Effect of Human Serum Albumin Reduces Alzheimer’s Disease Related Pathologies in the 3xTg Mouse Model,” *J. Alzheimer’s Dis.*, vol. 50, no. 1, pp. 175–188, Dec. 2015.

[5] A. R. Jones and E. V Shusta, “Blood-brain barrier transport of therapeutics via receptor-mediation.,” *Pharm. Res.*, vol. 24, no. 9, pp. 1759–71, Sep. 2007.

[6] D. M. Altmann, O. Lider, D. C. Douek, and I. R. Cohen, “Activation of specific T cell lines by the antigens avidin and myelin basic protein in the absence of antigen-presenting cells,” *Eur. J. Immunol.*, vol. 17, no. 11, pp. 1635–1640, Nov. 1987.

[7] T. Shimura, S. Tabata, T. Ohnishi, T. Terasaki, and A. Tsuji, “Transport mechanism of a new behaviorally highly potent adrenocorticotropic hormone (ACTH) analog, ebiratide, through the blood-brain barrier,” *J. Pharmacol. Exp. Ther.*, 1991.

[8] Y. Sal, M. Kajita, I. Tamai, J. Wakama, T. Wakamiya, and A. Tsuji, “Adsorptive-Mediated Transcytosis of a Synthetic Basic Peptide, 001-C8 in Caco-2 Cells,” 1998.

[9] G. W. Arendash *et al.*, “Caffeine Reverses Cognitive Impairment and Decreases Brain Amyloid-β Levels in Aged Alzheimer’s Disease Mice,” *J. Alzheimer’s Dis.*, vol. 17, no. 3, pp. 661–680, Jul. 2009.

[10] A. L. McCall, W. R. Millington, and R. J. Wurtman, “Blood-brain barrier transport of caffeine: dose-related restriction of adenine transport.,” *Life Sci.*, vol. 31, no. 24, pp. 2709–15, Dec. 1982.

[11] T. Al Reef and E. Ghanem, “Caffeine: Well-known as psychotropic substance, but little as immunomodulator,” *Immunobiology*, vol. 223, no. 12, pp. 818–825, Dec. 2018.

[12] S. Rocha, “Targeted Drug Delivery Across the Blood Brain Barrier in Alzheimer’s Disease.”

[13] S. Pecetta *et al.*, “Carrier priming effect of CRM 197 is related to an enhanced B and T cell activation in meningococcal serogroup A conjugate vaccination. Immunological comparison between CRM 197 and diphtheria toxoid,” *Vaccine*, vol. 34, no. 20, pp. 2334–2341, Apr. 2016.

[14] A. Fettelschoss, F. Zabel, and M. F. Bachmann, “Vaccination against Alzheimer disease: an update on future strategies.,” *Hum. Vaccin. Immunother.*, vol. 10, no. 4, pp. 847–51, 2014.

[15] Y. S. Batarseh *et al.*, “*Crocus sativus* Extract Tightens the Blood-Brain Barrier, Reduces Amyloid β Load and Related Toxicity in 5XFAD Mice,” *ACS Chem. Neurosci.*, vol. 8, no. 8, pp. 1756–1766, Aug. 2017.

[16] K. Chopra, S. Misra, and A. Kuhad, “Current perspectives on pharmacotherapy of Alzheimer’s disease,” *Expert Opin. Pharmacother.*, vol. 12, no. 3, pp. 335–350, Feb. 2011.

[17] W. A. Banks, “Drug delivery to the brain in Alzheimer’s disease: consideration of the blood-brain barrier.,” *Adv. Drug Deliv. Rev.*, vol. 64, no. 7, pp. 629–39, May 2012.

[18] J. WANG *et al.*, “Effects of Fructus Akebiae on learning and memory impairment in a scopolamine-induced animal model of dementia,” *Exp. Ther. Med.*, vol. 8, no. 2, pp. 671–675, Aug. 2014.

[19] V. V Dos Santos, A. L. S. Rodrigues, T. C. De Lima, S. R. de Barioglio, R. Raisman-Vozari, and R. D. Prediger, “Ghrelin as a neuroprotective and palliative agent in Alzheimer’s and Parkinson’s disease.,” *Curr. Pharm. Des.*, vol. 19, no. 38, pp. 6773–90, 2013.

[20] P. Zatta and M. Nicolini, *Non-Neuronal Cells in Alzheimer’s Disease*. WORLD SCIENTIFIC, 1995.

[21] L. Szablewski, “Glucose Transporters in Brain: In Health and in Alzheimer’s Disease,” *J. Alzheimer’s Dis.*, vol. 55, no. 4, pp. 1307–1320, Dec. 2016.

[22] C. S. Palmer, M. Ostrowski, B. Balderson, N. Christian, and S. M. Crowe, “Glucose metabolism regulates T cell activation, differentiation, and functions.,” *Front. Immunol.*, vol. 6, p. 1, 2015.

[23] C. Duran-Aniotz and C. Hetz, “Glucose Metabolism: A Sweet Relief of Alzheimer’s Disease,” *Curr. Biol.*, vol. 26, no. 17, pp. R806–R809, Sep. 2016.

[24] S. Chakraborty, J. Bandyopadhyay, S. Chakraborty, and S. Basu, “Multi-target screening mines hesperidin as a multi-potent inhibitor: Implication in Alzheimer’s disease therapeutics,” *Eur. J. Med. Chem.*, vol. 121, pp. 810–822, Oct. 2016.

[25] L. Ghezzi, E. Scarpini, and D. Galimberti, “Disease-modifying drugs in Alzheimer’s disease.,” *Drug Des. Devel. Ther.*, vol. 7, pp. 1471–8, Dec. 2013.

[26] M. A. Reger *et al.*, “Intranasal insulin administration dose-dependently modulates verbal memory and plasma amyloid-beta in memory-impaired older adults.,” *J. Alzheimers. Dis.*, vol. 13, no. 3, pp. 323–31, Apr. 2008.

[27] G. Marwarha and O. Ghribi, “Leptin signaling and Alzheimer’s disease.,” *Am. J. Neurodegener. Dis.*, vol. 1, no. 3, pp. 245–65, 2012.

[28] A. H. Newton and S. H. Benedict, “Low density lipoprotein promotes human naive T cell differentiation to Th1 cells,” *Hum. Immunol.*, vol. 75, no. 7, pp. 621–628, Jul. 2014.

[29] Y.-M. Kuo *et al.*, “Elevated Low-Density Lipoprotein in Alzheimer’s Disease Correlates with Brain Aβ 1–42 Levels,” *Biochem. Biophys. Res. Commun.*, vol. 252, no. 3, pp. 711–715, Nov. 1998.

[30] D. A. Casey, D. Antimisiaris, and J. O’Brien, “Drugs for Alzheimer’s disease: are they effective?,” *P T*, vol. 35, no. 4, pp. 208–11, Apr. 2010.

[31] T. Lowinus *et al.*, “Immunomodulation by memantine in therapy of Alzheimer’s disease is mediated through inhibition of Kv1.3 channels and T cell responsiveness.,” *Oncotarget*, vol. 7, no. 33, pp. 53797–53807, Aug. 2016.

[32] “Alzheimer’s disease: Does memantine help?,” Jun. 2017.

[33] G. V. Ramalingayya *et al.*, “Naringin and Rutin Alleviates Episodic Memory Deficits in Two Differentially Challenged Object Recognition Tasks.,” *Pharmacogn. Mag.*, vol. 12, no. Suppl 1, pp. S63-70, Jan. 2016.

[34] B. Jiang, L. Song, C. Huang, and W. Zhang, “P7C3 Attenuates the Scopolamine-Induced Memory Impairments in C57BL/6J Mice,” *Neurochem. Res.*, vol. 41, no. 5, pp. 1010–1019, May 2016.

[35] W. A. Banks, S. A. Farr, W. Butt, V. B. Kumar, M. W. Franko, and J. E. Morley, “Delivery across the blood-brain barrier of antisense directed against amyloid beta: reversal of learning and memory deficits in mice overexpressing amyloid precursor protein.,” *J. Pharmacol. Exp. Ther.*, vol. 297, no. 3, pp. 1113–21, Jun. 2001.

[36] W. A. Banks, “Peptides and the blood-brain barrier.,” *Peptides*, vol. 72, pp. 16–9, Oct. 2015.

[37] R. L. Juliano, “The delivery of therapeutic oligonucleotides.,” *Nucleic Acids Res.*, vol. 44, no. 14, pp. 6518–48, Aug. 2016.

[38] C. K. L. TOO, “Rapid Induction of Jak2 and Spl in T Cells by Phosphorothioate Oligonucleotides,” *Antisense Nucleic Acid Drug Dev.*, vol. 8, no. 2, pp. 87–94, Apr. 1998.

[39] S. K. Richetti *et al.*, “Quercetin and rutin prevent scopolamine-induced memory impairment in zebrafish,” *Behav. Brain Res.*, vol. 217, no. 1, pp. 10–15, Feb. 2011.

[40] R.-Y. Huang, Y.-L. Yu, W.-C. Cheng, C.-N. OuYang, E. Fu, and C.-L. Chu, “Immunosuppressive Effect of Quercetin on Dendritic Cell Activation and Function,” *J. Immunol.*, vol. 184, no. 12, pp. 6815–6821, Jun. 2010.

[41] A. M. Sabogal-Guáqueta, J. I. Muñoz-Manco, J. R. Ramírez-Pineda, M. Lamprea-Rodriguez, E. Osorio, and G. P. Cardona-Gómez, “The flavonoid quercetin ameliorates Alzheimer’s disease pathology and protects cognitive and emotional function in aged triple transgenic Alzheimer’s disease model mice,” *Neuropharmacology*, vol. 93, pp. 134–145, Jun. 2015.

[42] S. Habtemariam, Habtemariam, and Solomon, “Molecular Pharmacology of Rosmarinic and Salvianolic Acids: Potential Seeds for Alzheimer’s and Vascular Dementia Drugs,” *Int. J. Mol. Sci.*, vol. 19, no. 2, p. 458, Feb. 2018.

[43] S. Habtemariam, “The Therapeutic Potential of Rosemary ( *Rosmarinus officinalis* ) Diterpenes for Alzheimer’s Disease,” *Evidence-Based Complement. Altern. Med.*, vol. 2016, pp. 1–14, Jan. 2016.

[44] S. Habtemariam, “Rutin as a Natural Therapy for Alzheimer’s Disease: Insights into its Mechanisms of Action.”

[45] J.-H. Sung *et al.*, “Saturable distribution of tacrine into the striatal extracellular fluid of the rat: evidence of involvement of multiple organic cation transporters in the transport.,” *undefined*, 2005.

[46] N. Qizilbash, J. Birks, J. López Arrieta, S. Lewington, and S. Szeto, “Tacrine for Alzheimer’s disease,” *Cochrane Database Syst. Rev.*, no. 2, p. CD000202, Jan. 1999.

[47] C. Ning *et al.*, “Triptolide derivatives as potential multifunctional anti-Alzheimer agents: Synthesis and structure–activity relationship studies,” *Bioorg. Med. Chem. Lett.*, vol. 28, no. 4, pp. 689–693, Feb. 2018.

[48] H. Meng, L. Zhu, W. Ni, L. You, J. Jin, and W. Qian, “Triptolide inhibits the proliferation of cells from lymphocytic leukemic cell lines in association with downregulation of NF-κB activity and miR-16-1*.,” *Acta Pharmacol. Sin.*, vol. 32, no. 4, pp. 503–11, Apr. 2011.

[49] S. Moriguchi, “The role of vitamin E in T-cell differentiation and the decrease of cellular immunity with aging.,” *Biofactors*, vol. 7, no. 1–2, pp. 77–86, 1998.

[50] B. Cervantes and L. M. Ulatowski, “Vitamin E and Alzheimer’s Disease-Is It Time for Personalized Medicine?,” *Antioxidants (Basel, Switzerland)*, vol. 6, no. 3, Jun. 2017.

[51] C. J. Field, A. Van Aerde, K. L. Drager, S. Goruk, and T. Basu, “Dietary folate improves age-related decreases in lymphocyte function,” *J. Nutr. Biochem.*, vol. 17, no. 1, pp. 37–44, Jan. 2006.

[52] P. S. Aisen *et al.*, “High-Dose B Vitamin Supplementation and Cognitive Decline in Alzheimer Disease,” *JAMA*, vol. 300, no. 15, p. 1774, Oct. 2008.

[53] R. Malouf and J. Grimley Evans, “Folic acid with or without vitamin B12 for the prevention and treatment of healthy elderly and demented people,” *Cochrane Database Syst. Rev.*, no. 4, Oct. 2008.

[54] X.-T. Li *et al.*, “Multifunctional targeting daunorubicin plus quinacrine liposomes, modified by wheat germ agglutinin and tamoxifen, for treating brain glioma and glioma stem cells.,” *Oncotarget*, vol. 5, no. 15, pp. 6497–511, Aug. 2014.

[55] D. S. Taylor, J. C. Reed, and P. C. Nowell, “Stimulation and inhibition of human T cell subsets by wheat germ agglutinin.,” *J. Immunol.*, vol. 134, no. 6, pp. 3756–61, Jun. 1985.

[56] Y.-C. Kuo, C.-Y. Lin, J.-S. Li, and Y.-I. Lou, “Wheat germ agglutinin-conjugated liposomes incorporated with cardiolipin to improve neuronal survival in Alzheimer’s disease treatment.,” *Int. J. Nanomedicine*, vol. 12, pp. 1757–1774, 2017.

[57] W. Neuhaus, T. Krämer, A. Neuhoff, C. Gölz, S. C. Thal, and C. Y. Förster, “Multifaceted Mechanisms of WY-14643 to Stabilize the Blood-Brain Barrier in a Model of Traumatic Brain Injury.,” *Front. Mol. Neurosci.*, vol. 10, p. 149, 2017.

[58] N. Marx *et al.*, “PPAR Activators as Antiinflammatory Mediators in Human T Lymphocytes Implications for Atherosclerosis and Transplantation-Associated Arteriosclerosis,” 2002.

[59] L. Ma, H. Xue, R. Qi, Y. Wang, and L. Yuan, “Effect of γ-secretase inhibitor on Th17 cell differentiation and function of mouse psoriasis-like skin inflammation,” *J. Transl. Med.*, vol. 16, no. 1, p. 59, Dec. 2018.
